# Supplementary material for: Expression Profiling of RNA Transcripts during Neuronal Maturation and Ischemic Injury
Source: PubMed Central journal article supplement (PMC4111601; doi:10.1371/journal.pone.0103525), 2014-07-25
Supplement: pone.0103525.s003.pdf [file pone.0103525.s003.pdf]

### S3A

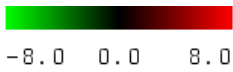

D4 D6 D8

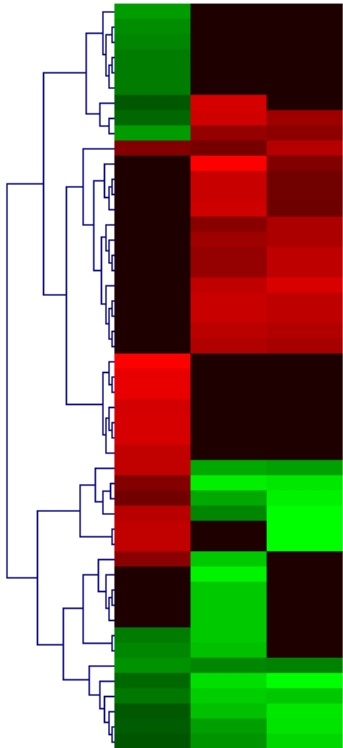

"G-protein signaling, coupled to cGMP nucleotide second messenger"  
 mRNA splice site selection  
 cell volume homeostasis  
 positive regulation of cardiac muscle hypertrophy  
 positive regulation of muscle hypertrophy  
 positive regulation of fatty acid biosynthetic process  
 regulation of protein homodimerisation activity  
 regulation of cholesterol biosynthetic process  
 synapse maturation  
 long-term memory  
 regulation of inhibitory postsynaptic membrane potential  
 endoplasmic reticulum unfolded protein response  
 cellular response to unfolded protein  
 membrane hyperpolarisation  
 quinone cofactor biosynthetic process  
 "synaptic transmission, cholinergic"  
 "positive regulation of synaptic transmission, GABAergic"  
 AMP metabolic process  
 nitric oxide mediated signal transduction  
 saliva secretion  
 positive regulation of digestive system process  
 quinone cofactor metabolic process  
 regulation of cholesterol metabolic process  
 positive regulation of membrane potential  
 inositol phosphate dephosphorylation  
 vesicle transport along microtubule  
 phosphatidylinositol-3-phosphate biosynthetic process  
 phosphorylated carbohydrate dephosphorylation  
 inositol phosphate catabolic process  
 cellular senescence  
 detection of mechanical stimulus involved in sensory perception of sound  
 natural killer cell differentiation  
central nervous system projection neuron axonogenesis  
 response to growth hormone stimulus  
 growth hormone receptor signaling pathway  
 cellular response to growth hormone stimulus  
 sphingosine metabolic process  
 G-protein coupled glutamate receptor signaling pathway  
 glycosphingolipid biosynthetic process  
 interferon-alpha production  
 regulation of interferon-alpha production  
 epithelial structure maintenance  
 "DNA damage response, signal transduction resulting in transcription"  
 water homeostasis  
regulation of dendritic spine morphogenesis  
 "DNA damage response, signal transduction by p53 class mediator resulting in transcription of p21 class mediator"  
 pyrimidine base metabolic process  
dendritic spine morphogenesis  
dendritic spine organisation

### S3B

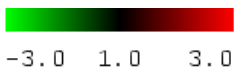

D4 D6 D8

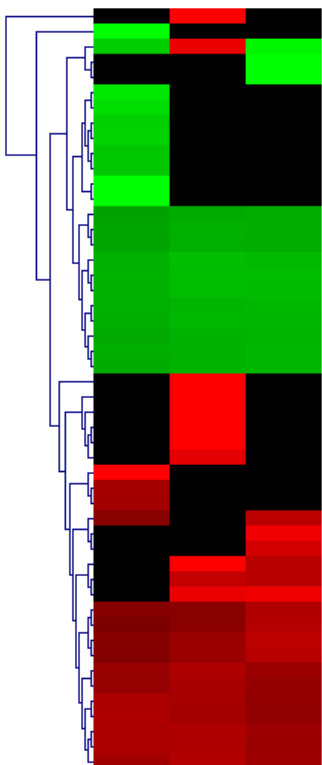

stem cell development  
 mRNA splice site selection  
 embryonic morphogenesis  
 embryonic organ morphogenesis  
 embryonic skeletal system morphogenesis  
 microtubule cytoskeleton organisation  
 RNA splicing  
 RNA processing  
 microtubule-based process  
 mRNA metabolic process  
 chromatin modification  
 ribonucleoprotein complex assembly  
 ribonucleoprotein complex subunit organisation  
 cellular macromolecule metabolic process  
 regulation of cellular metabolic process  
 regulation of primary metabolic process  
 RNA metabolic process  
 "transcription, DNA-dependent"  
 RNA biosynthetic process  
 regulation of RNA metabolic process  
 nucleic acid metabolic process  
 regulation of cellular biosynthetic process  
 "regulation of transcription, DNA-dependent"  
 regulation of cellular macromolecule biosynthetic process  
 embryonic skeletal system development  
 skeletal system development  
 regionalisation  
 pattern specification process  
 organ morphogenesis  
 cellular macromolecule catabolic process  
 anterior/posterior pattern specification  
 regulation of kinase activity  
 regulation of transferase activity  
 positive regulation of transcription from RNA polymerase II promoter  
 positive regulation of kinase activity  
regulation of neurogenesis  
system development  
positive regulation of cell differentiation  
 positive regulation of transferase activity  
 regulation of transcription from RNA polymerase II promoter  
 positive regulation of gene expression  
 "positive regulation of transcription, DNA-dependent"  
 positive regulation of RNA metabolic process  
 negative regulation of macromolecule biosynthetic process  
 negative regulation of cellular biosynthetic process  
 "negative regulation of nucleoside, nucleoside, nucleotide and nucleic acid metabolic process"  
 negative regulation of nitrogen compound metabolic process  
 "negative regulation of transcription, DNA-dependent"  
 negative regulation of RNA metabolic process  
 negative regulation of cellular macromolecule biosynthetic process

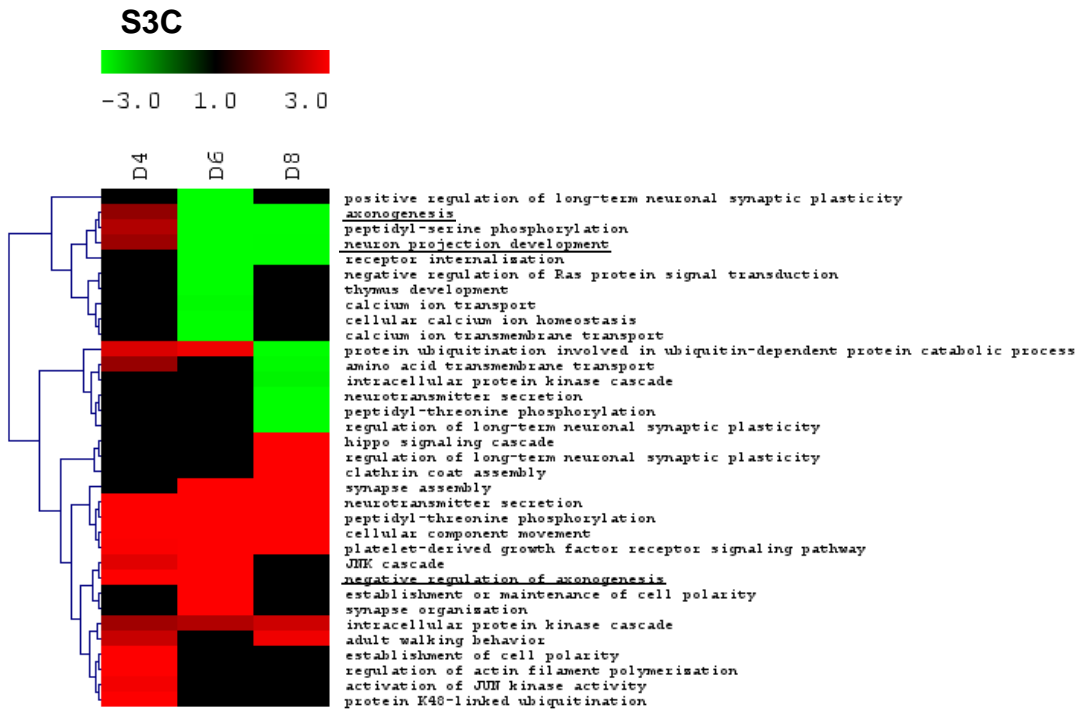

**S3D**

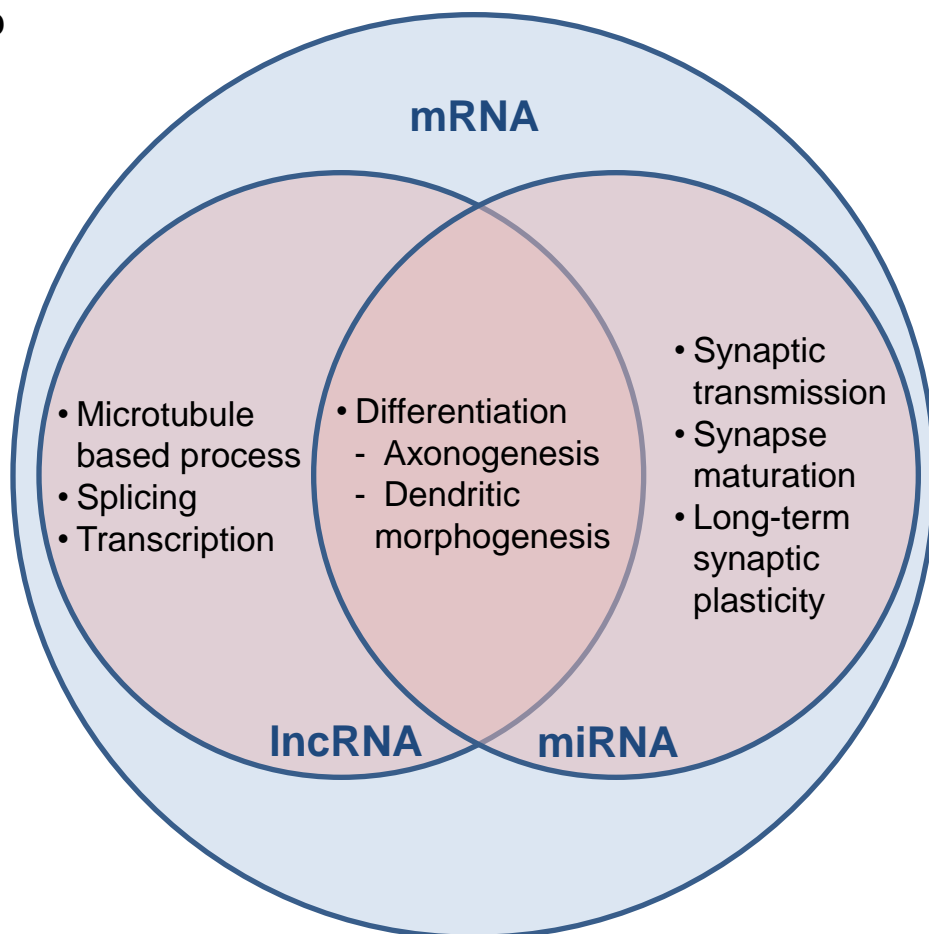

**Figure S3. Biological processes associated with differentially expressed (A) mRNAs, (B) lncRNAs associated with genes in sense/antisense/bidirectional orientation, (C) miRNAs. Green rectangle indicates fold enrichment for downregulated associated/predicted genes; red indicates fold enrichment of associated/predicted genes. (D) Biological processes which are common to the differentially expressed mRNAs, lncRNAs, and miRNAs.**
