# Supplementary material for: Expression Profiling of RNA Transcripts during Neuronal Maturation and Ischemic Injury
Source: PubMed Central journal article supplement (PMC4111601; doi:10.1371/journal.pone.0103525), 2014-07-25
Supplement: pone.0103525.s004.pdf [file pone.0103525.s004.pdf]

**Table S1. Specific primers for mRNAs and lncRNAs of 11 shortlisted genes.**

| Gene          |        | Accession No.      | Forward primer (5' – 3') | Reverse primer (5' – 3')   | Amplicon length |
|---------------|--------|--------------------|--------------------------|----------------------------|-----------------|
| <i>Axin2</i>  | mRNA   | NM_015732.4        | AGGTCCTGGCAACTCAGTAACAG  | CGCGAACGGCTGCTTATT         | 61              |
|               | lncRNA | ENSMUST00000143435 | GGTTCCACAGGCGTCATCTC     | CCC GCAGCAGCTTTCTTC        | 55              |
| <i>Cntn1</i>  | mRNA   | NM_001159648.1     | CAAGTAGCTAGGGTGGGCTC     | AAGACCTGTTCCCCACTCCT       | 139             |
|               | lncRNA | AK140484.1         | CTGCAAAGGGAGTGGAAGCTA    | GTAGGCAAGCAAATAGGCAGTGA    | 63              |
| <i>Igf1r</i>  | mRNA   | NM_010513.2        | GCGATTTAGAGAAACGAACATTCC | TGTCACGATGCCGGTACC         | 82              |
|               | lncRNA | AK040698.1         | AAGCACAGGACTTGGAACAG     | TTTCAAGCGAGGGCGTCTAG       | 60              |
| <i>Ikkbb</i>  | mRNA   | NM_010546.2        | TCTAAATGGCCTTTTCCTGCTAAT | TGACTCCCCAAAGTTAGATGCA     | 68              |
|               | lncRNA | uc009ldv.1         | CATCCGGTGGCACAATCA       | TTCCCGACAGGTCGTCTGA        | 59              |
| <i>Ncam1</i>  | mRNA   | NM_010875.3        | CGCCCCAGCTTGCCTACT       | GAAGTTCCTGGCTTTTTTCATAAACA | 65              |
|               | lncRNA | AK156022           | CTCTACAAGTTCAAGCGTTTGCA  | GTGACTTTACGTCTGCCAAGTGA    | 65              |
| <i>Negr1</i>  | mRNA   | NM_001039094       | TGAAGCAGCGTGGGATACAAT    | CCAGCGATTCCACAGACAAA       | 67              |
|               | lncRNA | uc008rva.1         | CATCACCACCCTGCAGAAGA     | GCTGCAAACCTCTCCGTTAATT     | 60              |
| <i>Nrxn1</i>  | mRNA   | NM_020252          | GTCAGCACTCAGGCATTGGA     | CTTCTTGCGTGTAGCCCGTT       | 81              |
|               | lncRNA | uc008dwg.1         | GGCTGATCTCCACCTCATT      | TCTGCTACTGGTTTAGTCCACA     | 109             |
| <i>Ntrk2</i>  | mRNA   | NM_008745.3        | TGTTGCCTATCCCAGGAAGTG    | CTGCAGACATCCTCGGAGATTA     | 75              |
|               | lncRNA | AK021278.1         | GAGATGTACTGCTGACTCCAAGCA | TCCTTGCACCCGCACTGT         | 62              |
| <i>Prkcb</i>  | mRNA   | NM_008855.2        | CAGAGATTGCCATCGGTCTGT    | CCCCTCAGAATCCAGCATCA       | 92              |
|               | lncRNA | ENSMUST00000118119 | GCAGAGGTTGGGTCCAAGTC     | TGGGTGACCGGCAAATGT         | 61              |
| <i>Ralgds</i> | mRNA   | NM_009058.2        | AGAGAAGCCCTCTCGTGAAGTCTG | GGTGGTCAATGGCACTTTCAG      | 69              |
|               | lncRNA | uc008iyq.1         | CAGGAAAAGAAGGTGGGCGAC    | ATGCTCTTGTACATGTTGCC       | 77              |
| <i>Sh2b3</i>  | mRNA   | NM_008507.3        | CAGCTTGTGACGTCCGACTCT    | GGACGGTGTGGAGGAACCT        | 72              |
|               | lncRNA | AK007127.1         | GAGAGACCTGCTCTGGAAAG     | GGTTTCTCCACTTCTGCGA        | 94              |

Specific accession numbers of the mRNAs and lncRNAs are indicated with forward and reverse primers to amplify the specific transcript. Length of the amplified PCR product is also indicated.
