# Supplementary material for: Expression Profiling of RNA Transcripts during Neuronal Maturation and Ischemic Injury
Source: PubMed Central journal article supplement (PMC4111601; doi:10.1371/journal.pone.0103525), 2014-07-25
Supplement: pone.0103525.s005.pdf [file pone.0103525.s005.pdf]

**Table S2. MIQE checklist for authors, reviewers and editors.** Essential (E) and desirable information (D) has been made available in this table. Further details have been described in the main manuscript.

| ITEM TO CHECK                                                        | IMPORTANCE | CHECKLIST      |
|----------------------------------------------------------------------|------------|----------------|
| <b>EXPERIMENTAL DESIGN</b>                                           |            |                |
| Definition of experimental and control groups                        | E          | Yes            |
| Number within each group                                             | E          | Yes            |
| Assay carried out by core lab or investigator's lab?                 | D          | Yes            |
| Acknowledgement of authors' contributions                            | D          | Yes            |
| <b>SAMPLE</b>                                                        |            |                |
| Description                                                          | E          |                |
| Volume/mass of sample processed                                      | D          | Yes            |
| Microdissection or macrodissection                                   | E          | No             |
| Processing procedure                                                 | E          | No             |
| If frozen - how and how quickly?                                     | E          | No             |
| If fixed - with what, how quickly?                                   | E          | No             |
| Sample storage conditions and duration (especially for FFPE samples) | E          | No             |
| <b>NUCLEIC ACID EXTRACTION</b>                                       |            |                |
| Procedure and/or instrumentation                                     | E          | Yes            |
| Name of kit and details of any modifications                         | E          | Yes            |
| Source of additional reagents used                                   | D          | Not applicable |
| Details of DNase or RNase treatment                                  | E          | Yes            |
| Contamination assessment (DNA or RNA)                                | E          | Yes            |
| Nucleic acid quantification                                          | E          | Yes            |
| Instrument and method                                                | E          | Yes            |
| Purity (A260/A280)                                                   | D          | Yes            |
| Yield                                                                | D          | Yes            |
| RNA integrity method/instrument                                      | E          | Yes            |
| RIN/RQI or Cq of 3' and 5' transcripts                               | E          | No             |
| Electrophoresis traces                                               | D          | Yes            |
| Inhibition testing (Cq dilutions, spike or other)                    | E          | Yes            |
| <b>REVERSE TRANSCRIPTION</b>                                         |            |                |
| Complete reaction conditions                                         | E          | Yes            |
| Amount of RNA and reaction volume                                    | E          | Yes            |
| Priming oligonucleotide (if using GSP) and concentration             | E          | Yes            |
| Reverse transcriptase and concentration                              | E          | Yes            |
| Temperature and time                                                 | E          | Yes            |
| Manufacturer of reagents and catalogue numbers                       | D          | No             |
| Cqs with and without RT                                              | D*         | Yes            |
| Storage conditions of cDNA                                           | D          | Not applicable |
| <b>qPCR TARGET INFORMATION</b>                                       |            |                |
| If multiplex, efficiency and LOD of each assay.                      | E          | Not applicable |
| Sequence accession number                                            | E          | Yes            |
| Location of amplicon                                                 | D          | Yes            |
| Amplicon length                                                      | E          | Yes            |
| <i>In silico</i> specificity screen (BLAST, etc)                     | E          | Yes            |
| Pseudogenes, retropseudogenes or other homologs?                     | D          | No             |
| Sequence alignment                                                   | D          | No             |
| Secondary structure analysis of amplicon                             | D          | No             |
| Location of each primer by exon or intron (if applicable)            | E          | Not applicable |
| What splice variants are targeted?                                   | E          | Not applicable |

\*: Assessing the absence of DNA using a no RT assay is essential when first extracting RNA. Once the sample has been validated as RDNA-free, inclusion of a no-RT control is desirable, but no longer essential.

\*\*\*: Disclosure of the probe sequence is highly desirable and strongly encouraged. However, since not all commercial pre-designed assay vendors provide this information, it cannot be an essential requirement. Use of such assays is advised against.

**Table S2. MIQE checklist for authors, reviewers and editors.** Essential (E) and desirable information (D) has been made available in this table. Further details have been described in the main manuscript.

| <b>qPCR OLIGONUCLEOTIDES</b>                              |     |                                                                |
|-----------------------------------------------------------|-----|----------------------------------------------------------------|
| Primer sequences                                          | E   | Yes                                                            |
| RTPrimerDB Identification Number                          | D   | No                                                             |
| Probe sequences                                           | D** | No (Probe sequence not provided by manufacturer)               |
| Location and identity of any modifications                | E   | Not applicable                                                 |
| Manufacturer of oligonucleotides                          | D   | No                                                             |
| Purification method                                       | D   | No                                                             |
| <b>qPCR PROTOCOL</b>                                      |     |                                                                |
| Complete reaction conditions                              | E   | Yes                                                            |
| Reaction volume and amount of cDNA/DNA                    | E   | Yes                                                            |
| Primer, (probe), Mg <sup>++</sup> and dNTP concentrations | E   | Yes                                                            |
| Polymerase identity and concentration                     | E   | Yes                                                            |
| Buffer/kit identity and manufacturer                      | E   | Yes                                                            |
| Exact chemical constitution of the buffer                 | D   | No (Exact constitution of buffer not provided by manufacturer) |
| Additives (SYBR Green I, DMSO, etc.)                      | E   | Yes                                                            |
| Manufacturer of plates/tubes and catalog number           | D   | No                                                             |
| Complete thermocycling parameters                         | E   | Yes                                                            |
| Reaction setup (manual/robotic)                           | D   | Yes (Manual)                                                   |
| Manufacturer of qPCR instrument                           | E   | Yes                                                            |
| <b>qPCR VALIDATION</b>                                    |     |                                                                |
| Evidence of optimisation (from gradients)                 | D   | No                                                             |
| Specificity (gel, sequence, melt, or digest)              | E   | Yes                                                            |
| For SYBR Green I, C <sub>q</sub> of the NTC               | E   | Yes                                                            |
| Standard curves with slope and y-intercept                | E   | Yes                                                            |
| PCR efficiency calculated from slope                      | E   | Yes (106%)                                                     |
| Confidence interval for PCR efficiency or standard error  | D   | No                                                             |
| r <sup>2</sup> of standard curve                          | E   | Yes (0.99)                                                     |
| Linear dynamic range                                      | E   | Yes (1 to 10ng)                                                |
| C <sub>q</sub> variation at lower limit                   | E   | Yes (1.9)                                                      |
| Confidence intervals throughout range                     | D   | No                                                             |
| Evidence for limit of detection                           | E   | Yes (at no template control level)                             |
| If multiplex, efficiency and LOD of each assay.           | E   | Not applicable                                                 |
| <b>DATA ANALYSIS</b>                                      |     |                                                                |
| qPCR analysis program (source, version)                   | E   | Yes                                                            |
| C <sub>q</sub> method determination                       | E   | Yes                                                            |
| Outlier identification and disposition                    | E   | Yes                                                            |
| Results of NTCs                                           | E   | Yes                                                            |
| Justification of number and choice of reference genes     | E   | Yes                                                            |
| Description of normalisation method                       | E   | Yes                                                            |
| Number and concordance of biological replicates           | D   | Yes                                                            |
| Number and stage (RT or qPCR) of technical replicates     | E   | Yes                                                            |
| Repeatability (intra-assay variation)                     | E   | Yes                                                            |
| Reproducibility (inter-assay variation, %CV)              | D   | No                                                             |
| Power analysis                                            | D   | No                                                             |
| Statistical methods for result significance               | E   | Yes                                                            |
| Software (source, version)                                | E   | Yes                                                            |
| C <sub>q</sub> or raw data submission using RDML          | D   | No                                                             |

\*: Assessing the absence of DNA using a no RT assay is essential when first extracting RNA. Once the sample has been validated as RDNA-free, inclusion of a no-RT control is desirable, but no longer essential.

\*\*\*: Disclosure of the probe sequence is highly desirable and strongly encouraged. However, since not all commercial pre-designed assay vendors provide this information, it cannot be an essential requirement. Use of such assays is advised against.
