# Supplementary material for: Expression Profiling of RNA Transcripts during Neuronal Maturation and Ischemic Injury
Source: PubMed Central journal article supplement (PMC4111601; doi:10.1371/journal.pone.0103525), 2014-07-25
Supplement: pone.0103525.s006.pdf [file pone.0103525.s006.pdf]

**Table S3. Associated gene names of lncRNAs for each cluster indicated in Figure S2B.**

| <b>Cluster</b>     | <b>LncRNA sequence name</b>                | <b>Associated gene name</b>                                                           |
|--------------------|--------------------------------------------|---------------------------------------------------------------------------------------|
| 1                  | ENSMUST00000136988                         | Intergenic                                                                            |
|                    | ENSMUST00000160545                         | radial spoke head protein 3 homolog A                                                 |
|                    | AK016186                                   | promethin                                                                             |
|                    | AK140199                                   | Intergenic                                                                            |
|                    | ENSMUST00000120038                         | filensin                                                                              |
|                    | ENSMUST00000150111                         | Intergenic                                                                            |
|                    | AK157753                                   | Intergenic                                                                            |
|                    | AK131936                                   | Intergenic                                                                            |
|                    | MM9LINCRNAEXON11613+                       | Intergenic                                                                            |
|                    | ENSMUST00000120964                         | Intergenic                                                                            |
| 2                  | uc009mdo.1                                 | mitochondrial tRNA modification GTPase GTPBP3, plasmalemma vesicle-associated protein |
|                    | AK035023                                   | protein phosphatase 1 regulatory subunit 12B                                          |
|                    | ENSMUST00000145638                         | hypothetical protein LOC233812                                                        |
|                    | AK131893                                   | condensin-2 complex subunit H2 isoform b                                              |
|                    | uc.64+                                     | EH domain-binding protein 1                                                           |
|                    | ENSMUST00000133752                         | palladin                                                                              |
|                    | ENSMUST00000143962                         | fibroblast growth factor receptor substrate 3                                         |
|                    | ENSMUST00000133231                         | Intergenic                                                                            |
|                    | MM9LINCRNAEXON10527+                       | Intergenic                                                                            |
|                    | AK011807                                   | tetratricopeptide repeat protein 23 isoform 1                                         |
| 3                  | NR_003517                                  | protein SF11 homolog                                                                  |
|                    | ENSMUST00000109666                         | Intergenic                                                                            |
|                    | ENSMUST00000154992                         | peroxisomal multifunctional enzyme type 2                                             |
|                    | AK050092                                   | Intergenic                                                                            |
|                    | AK139812                                   | Intergenic                                                                            |
|                    | ENSMUST00000119652                         | Intergenic                                                                            |
|                    | AK156415                                   | Intergenic                                                                            |
|                    | ENSMUST00000117585                         | Intergenic                                                                            |
|                    | ENSMUST00000117760                         | Intergenic                                                                            |
|                    | uc008pwq.1                                 | Intergenic                                                                            |
| 4                  | uc009rwl.1                                 | Intergenic                                                                            |
|                    | ENSMUST00000117305                         | cytosolic carboxypeptidase 6 isoform 1                                                |
|                    | MM9LINCRNAEXON10225-                       | Intergenic                                                                            |
|                    | ENSMUST00000129364                         | zinc finger protein 335                                                               |
|                    | MM9LINCRNAEXON10254-                       | Intergenic                                                                            |
|                    | uc007boy.1                                 | striated muscle-specific                                                              |
|                    | AK002799                                   | cip1-interacting zinc finger protein                                                  |
|                    | MM9LINCRNAEXON10523+                       | Intergenic                                                                            |
|                    | uc007jey.1                                 | folliculin                                                                            |
|                    | ENSMUST00000128848                         | inactive ubiquitin carboxyl-terminal hydrolase                                        |
| ENSMUST00000155388 | homeobox protein Hox-B3                    |                                                                                       |
| ENSMUST00000136940 | hypothetical protein LOC232035             |                                                                                       |
| uc007waw.1         | WNT1-inducible-signaling pathway protein 1 |                                                                                       |
