# Supplementary material for: Expression Profiling of RNA Transcripts during Neuronal Maturation and Ischemic Injury
Source: PubMed Central journal article supplement (PMC4111601; doi:10.1371/journal.pone.0103525), 2014-07-25
Supplement: pone.0103525.s008.pdf [file pone.0103525.s008.pdf]

**Table S5. Validation and quantification of mRNA and 1 randomly selected lncRNA in maturing neurons.** Pearson's correlation coefficient ( $R_{array}$ ) based on the microarray data, was computed between SLR and days 2, 4, 6, 8 after maturation. Pearson's correlation coefficient ( $R_{qPCR}$ ) based on qPCR, was computed between fold change and days 2, 4, 6, 8, 14 after maturation. Expression is shown in fold change  $\pm$  SD relative to Day 2. Expression of GAPDH was used as a control/housekeeping gene to normalize mRNA and lncRNA expression. Statistically significant differences were tested using the two sample *t-test* (\* $p < 0.05$ , \*\* $p < 0.01$ ). Mean  $C_T$  value  $\pm$  SD for the no template control (NTC) is indicated.

| Gene                                              | mRNA               | Microarray<br>$R_{array}$ | qPCR (Fold change $\pm$ SD) |                    |                    |                    | $R_{qPCR}$ | qPCR ( $C_T \pm$ SD) |
|---------------------------------------------------|--------------------|---------------------------|-----------------------------|--------------------|--------------------|--------------------|------------|----------------------|
|                                                   | lncRNA             |                           | D4                          | D6                 | D8                 | D14                |            | NTC                  |
| Proliferation and differentiation related pathway |                    |                           |                             |                    |                    |                    |            |                      |
| <i>Axin2</i>                                      | NM_015732          | -0.83                     | -1.38 $\pm$ 0.01*           | -1.34 $\pm$ 0.01*  | -1.16 $\pm$ 0.01   | -2.63 $\pm$ 0.17*  | -0.88      | Undetermined         |
|                                                   | ENSMUST00000143435 | 0.28                      | 1.08 $\pm$ 0.06             | 1.70 $\pm$ 0.06*   | 3.28 $\pm$ 1.04*   | 3.04 $\pm$ 1.52*   | 0.86       | 39.3 $\pm$ 0.7       |
| <i>Igfl1r</i>                                     | NM_010513          | 0.54                      | -1.75 $\pm$ 0.01**          | -2.08 $\pm$ 0.02** | -1.68 $\pm$ 0.02** | -1.24 $\pm$ 0.02** | 0.00       | Undetermined         |
|                                                   | AK040698           | -0.97                     | -1.65 $\pm$ 0.01**          | 1.08 $\pm$ 0.02*   | 1.27 $\pm$ 0.13*   | -4.77 $\pm$ 0.01** | -0.71      | Undetermined         |
| <i>Ikbkb</i>                                      | NM_010546          | 0.87                      | -1.27 $\pm$ 0.01*           | -1.44 $\pm$ 0.02*  | -1.32 $\pm$ 0.02*  | -2.34 $\pm$ 0.02** | -0.95      | Undetermined         |
|                                                   | uc009ldv.1         | -0.04                     | -1.35 $\pm$ 0.15            | -1.68 $\pm$ 0.02** | -1.96 $\pm$ 0.02** | -1.90 $\pm$ 0.24** | -0.81      | 35.6 $\pm$ 0.7       |
| <i>Prkcb</i>                                      | NM_008855          | 0.95                      | 1.88 $\pm$ 0.07**           | 2.01 $\pm$ 0.01**  | 2.99 $\pm$ 0.02**  | 11.48 $\pm$ 0.20** | 0.99       | 36.8 $\pm$ 0.1       |
|                                                   | ENSMUST00000118119 | 0.94                      | 1.12 $\pm$ 0.01*            | 1.00 $\pm$ 0.01    | -1.01 $\pm$ 0.01   | 1.90 $\pm$ 0.74*   | 0.83       | Undetermined         |
| <i>Ralgds</i>                                     | NM_009058          | -0.64                     | -1.21 $\pm$ 0.05*           | -1.22 $\pm$ 0.01** | -1.02 $\pm$ 0.02   | -1.40 $\pm$ 0.01** | -0.68      | 37.0 $\pm$ 0.1       |
|                                                   | uc008iyq.1         | -0.73                     | -1.31 $\pm$ 0.01**          | -1.43 $\pm$ 0.01** | -1.58 $\pm$ 0.01** | -1.73 $\pm$ 0.02** | -0.89      | 33.9 $\pm$ 0.2       |
| Cell adhesion molecules                           |                    |                           |                             |                    |                    |                    |            |                      |
| <i>Cntn1</i>                                      | NM_001159648       | -0.78                     | 1.39 $\pm$ 0.06*            | 1.76 $\pm$ 0.05**  | 2.27 $\pm$ 0.03**  | 2.69 $\pm$ 0.05**  | 0.93       | 34.9 $\pm$ 0.1       |
|                                                   | AK140484           | 0.47                      | -1.45 $\pm$ 0.01*           | 1.10 $\pm$ 0.01    | 1.07 $\pm$ 0.02    | -1.40 $\pm$ 0.07*  | -0.34      | Undetermined         |
| <i>Ncam1</i>                                      | NM_010875          | 0.89                      | -1.05 $\pm$ 0.06            | 1.29 $\pm$ 0.01**  | 1.35 $\pm$ 0.02**  | 1.44 $\pm$ 0.04**  | 0.85       | Undetermined         |
|                                                   | AK156022           | -0.41                     | 1.03 $\pm$ 0.03             | 1.01 $\pm$ 0.02    | -1.07 $\pm$ 0.03*  | -2.32 $\pm$ 0.01** | -0.90      | 37.1 $\pm$ 0.1       |
| <i>Negr1</i>                                      | NM_001039094       | 0.96                      | 1.46 $\pm$ 0.03**           | 2.60 $\pm$ 0.01**  | 2.82 $\pm$ 0.02**  | 2.15 $\pm$ 0.05**  | 0.62       | Undetermined         |
|                                                   | uc008rva.1         | -0.53                     | 1.09 $\pm$ 0.02*            | 1.02 $\pm$ 0.02    | -1.09 $\pm$ 0.01** | -1.16 $\pm$ 0.04** | -0.85      | Undetermined         |
| <i>Nrxn1</i>                                      | NM_020252          | 0.21                      | 1.17 $\pm$ 0.01**           | 1.03 $\pm$ 0.02    | 1.07 $\pm$ 0.01**  | 1.69 $\pm$ 0.01**  | 0.86       | Undetermined         |
|                                                   | uc008dwg.1         | -0.48                     | -1.63 $\pm$ 0.01**          | -1.34 $\pm$ 0.03*  | -1.55 $\pm$ 0.02** | -1.44 $\pm$ 0.02*  | -0.44      | Undetermined         |
| Neurotrophin signalling pathway                   |                    |                           |                             |                    |                    |                    |            |                      |
| <i>Ntrk2</i>                                      | NM_008745          | 0.96                      | 1.16 $\pm$ 0.08             | 2.06 $\pm$ 0.01**  | 3.82 $\pm$ 0.01**  | 4.90 $\pm$ 1.93**  | 0.93       | Undetermined         |
|                                                   | AK021278           | -0.87                     | -1.50 $\pm$ 0.12*           | -1.40 $\pm$ 0.07*  | -1.46 $\pm$ 0.04*  | -1.70 $\pm$ 0.12*  | -0.78      | 37.1 $\pm$ 0.3       |
| <i>Sh2b3</i>                                      | NM_008507          | 0.84                      | -1.35 $\pm$ 0.02**          | -1.14 $\pm$ 0.06   | 1.00 $\pm$ 0.06    | 1.44 $\pm$ 0.03**  | 0.79       | 37.0 $\pm$ 0.1       |
|                                                   | AK007127           | -0.53                     | -1.58 $\pm$ 0.03**          | 1.25 $\pm$ 0.01**  | 1.73 $\pm$ 0.08**  | -6.64 $\pm$ 0.01** | -0.68      | 37.0 $\pm$ 0.2       |
