# Supplementary material for: Expression Profiling of RNA Transcripts during Neuronal Maturation and Ischemic Injury
Source: PubMed Central journal article supplement (PMC4111601; doi:10.1371/journal.pone.0103525), 2014-07-25
Supplement: pone.0103525.s009.pdf [file pone.0103525.s009.pdf]

**Table S6. Validation and quantification of miRNAs in maturing neurons.** Pearson's correlation coefficient ( $R_{array}$ ) based on the microarray data, was computed between SLR and days 2, 4, 6, 8 after maturation. Pearson's correlation coefficient ( $R_{qPCR}$ ) based on qPCR, was computed between fold change and days 2, 4, 6, 8, 14 after maturation. Expression is shown in fold change  $\pm$  SD relative to Day 2. Expression of GAPDH was used as a control/housekeeping gene to normalize miRNA expression. Statistically significant differences were tested using the two sample *t*-test ( $*p < 0.05$ ,  $**p < 0.01$ ). Mean  $C_T$  value  $\pm$  SD for the no template control (NTC) is indicated.

|            | Microarray  | qPCR (Fold change $\pm$ SD) |                    |                    |                    | $R_{qPCR}$ | qPCR ( $C_T \pm$ SD) |
|------------|-------------|-----------------------------|--------------------|--------------------|--------------------|------------|----------------------|
|            | $R_{array}$ | D4                          | D6                 | D8                 | D14                |            | NTC                  |
| miR-124    | -0.44       | 1.25 $\pm$ 0.01*            | 1.16 $\pm$ 0.09*   | -1.12 $\pm$ 0.05   | -1.70 $\pm$ 0.01** | -0.99      | Undetermined         |
| miR-129    | -0.22       | 1.81 $\pm$ 0.04**           | 2.24 $\pm$ 0.03**  | 1.34 $\pm$ 0.02*   | -4.80 $\pm$ 0.01** | -0.95      | Undetermined         |
| miR-218    | -0.35       | 1.30 $\pm$ 0.03**           | -1.07 $\pm$ 0.04*  | 1.31 $\pm$ 0.02**  | 1.23 $\pm$ 0.08**  | 0.15       | Undetermined         |
| miR-290-5p | 0.15        | -1.04 $\pm$ 0.19            | 1.16 $\pm$ 0.01**  | 1.36 $\pm$ 0.47    | 2.25 $\pm$ 1.09*   | 1.00       | Undetermined         |
| miR-326    | 0.44        | 1.43 $\pm$ 0.29             | 1.25 $\pm$ 0.02**  | 1.87 $\pm$ 0.01**  | -1.26 $\pm$ 0.03*  | -0.70      | Undetermined         |
| miR-203    | -0.99       | -1.67 $\pm$ 0.02**          | -3.17 $\pm$ 0.03** | -3.16 $\pm$ 0.02** | -5.44 $\pm$ 0.01** | -0.93      | Undetermined         |
| miR-377    | -0.99       | 12.51 $\pm$ 3.84*           | 12.00 $\pm$ 0.69** | 5.13 $\pm$ 1.01*   | -1.91 $\pm$ 0.01** | -0.98      | Undetermined         |
